# Supplementary material for: Solving Beam-Angle Selection and Dose Optimization Simultaneously via High-Throughput Computing
Source: Atypon-hosted journal article supplement (doi:10.1287/ijoc.1080.0297), 2008-11-14
Supplement: ijoc.1080.0297-sm-online-supplement.pdf [file ijoc.1080.0297-sm-online-supplement.pdf]

# Online Supplement to “Solving Beam-Angle Selection and Dose Optimization Simultaneously via High-Throughput Computing”

Hao Howard Zhang, Leyuan Shi

Department of Industrial and Systems Engineering, University of Wisconsin-Madison, 1513 University Avenue, Madison, Wisconsin 53706-1572, USA, {haoz@cae.wisc.edu, leyuan@engr.wisc.edu}

Robert Meyer

Department of Computer Sciences, University of Wisconsin-Madison, 1210 W. Dayton Street, Madison, Wisconsin 53706-1685, USA, rrm@cs.wisc.edu

Daryl Nazareth, Warren D’Souza

Department of Radiation Oncology, University of Maryland at Baltimore, 22 South Greene Street, Baltimore, Maryland 21201, USA, dnaza001@umaryland.edu, wdsou001@umaryland.edu

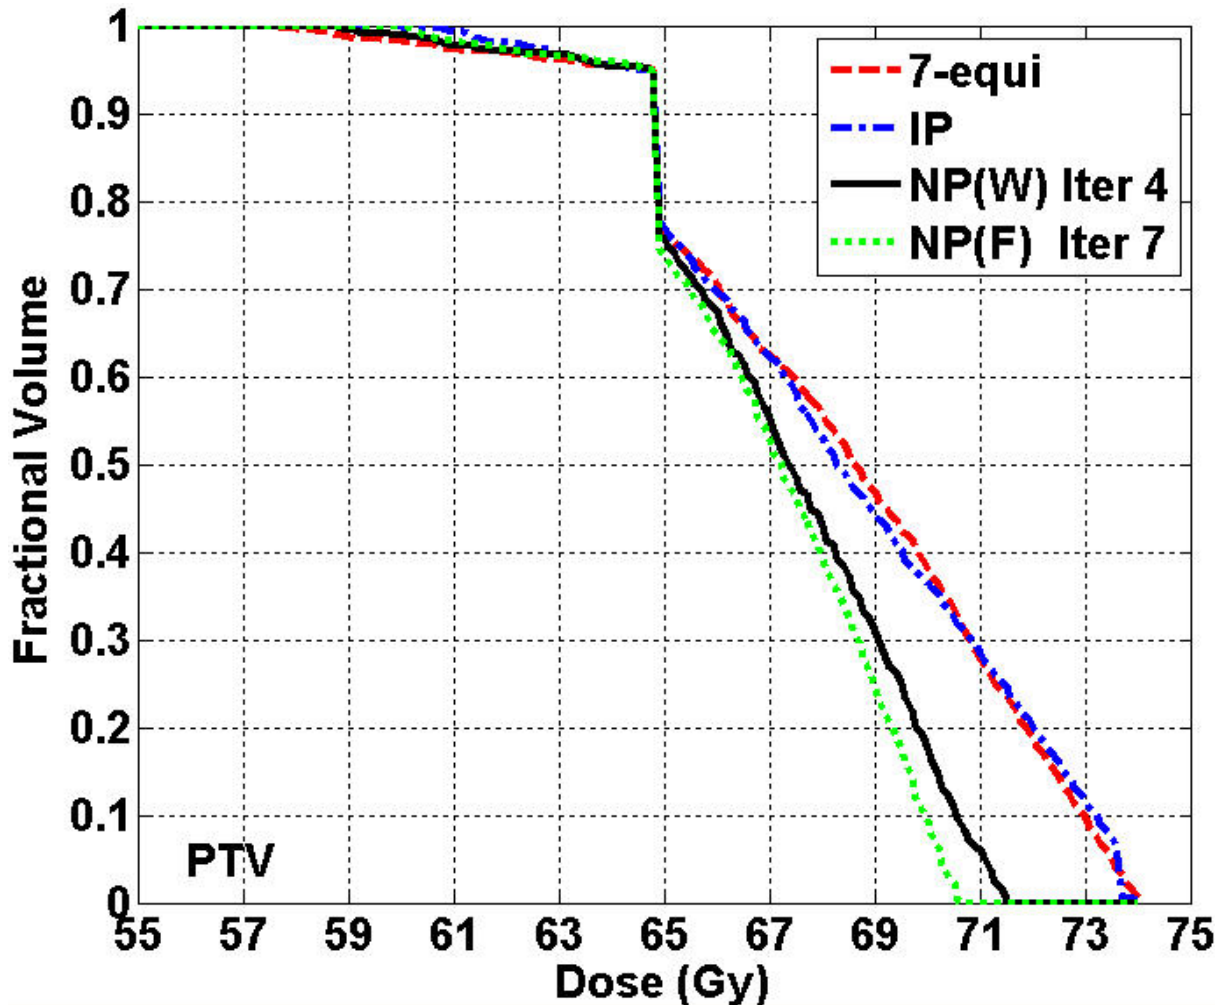

Figure A1: PTV DVHs Comparing Frequency-Based (F) and Beam-Weight-Based (W) Methods

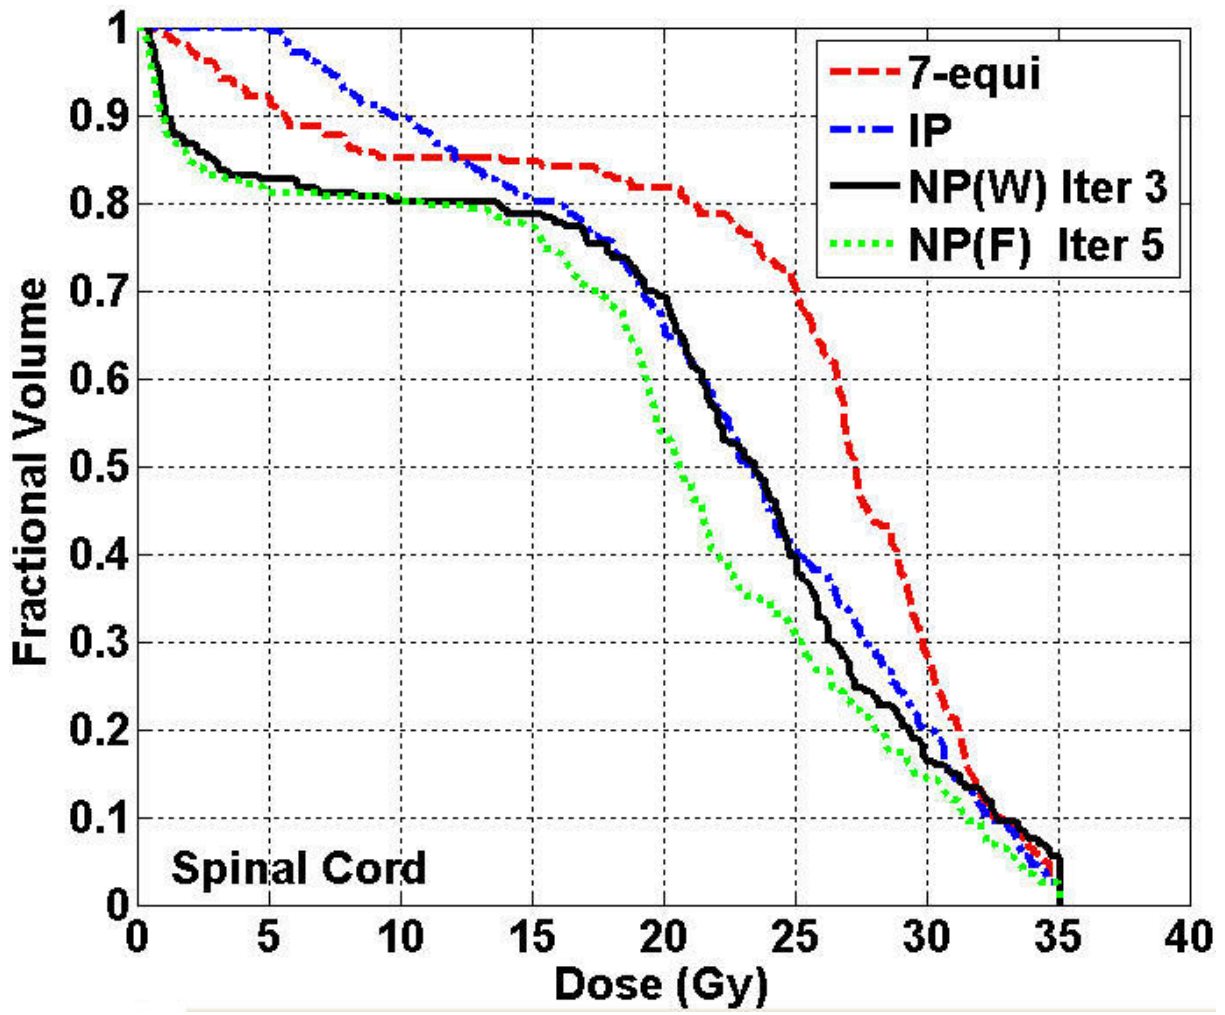

Figure A2: Spinal Cord DVHs Comparing Frequency-Based (F) and Beam-Weight-Based (W) Methods

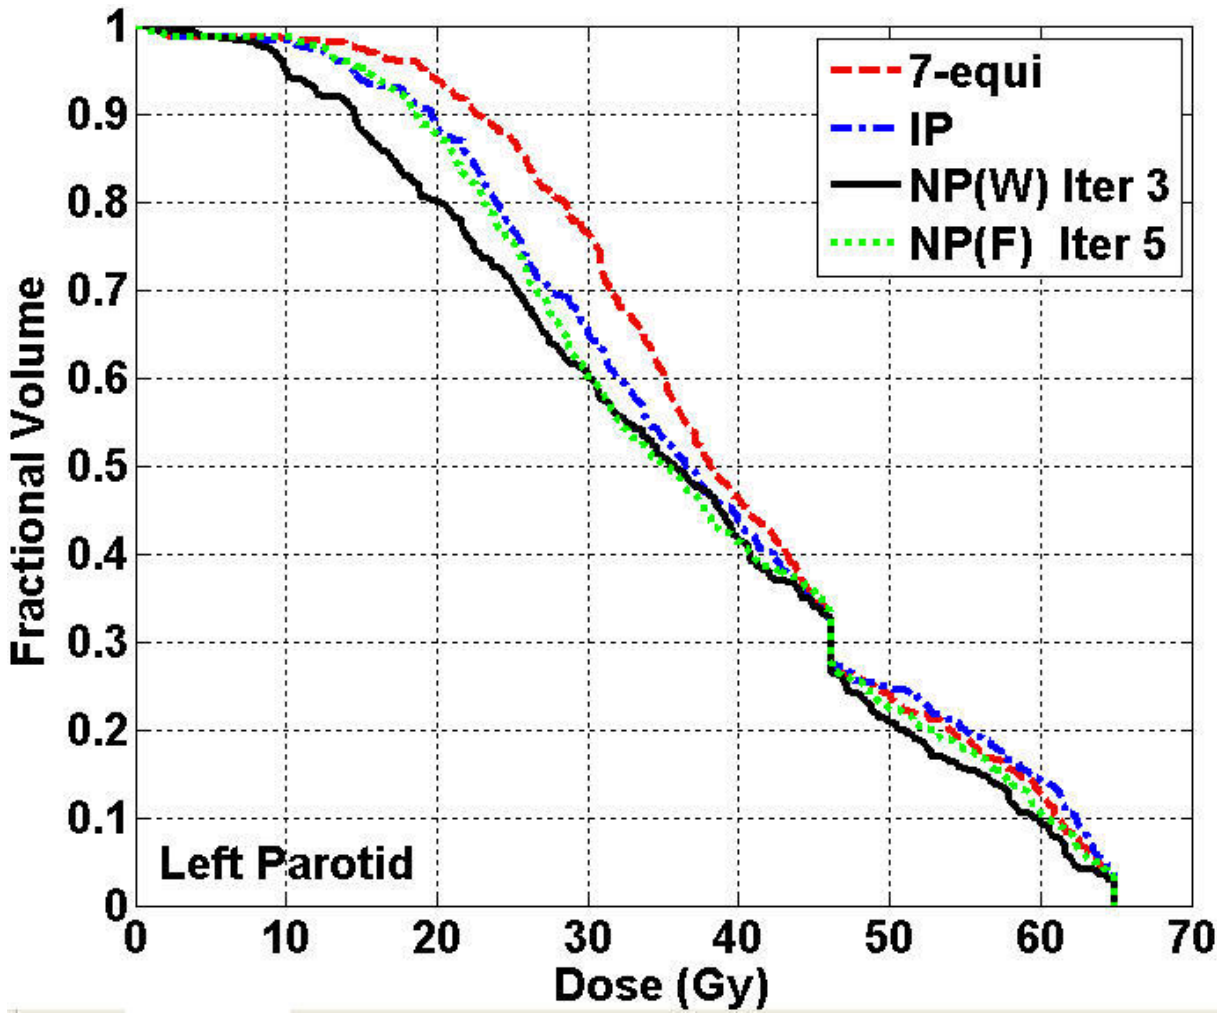

Figure A3: Left Parotid DVHs Comparing Frequency-Based (F) and Beam-Weight-Based (W) Methods
